# Supplementary material for: Recombinant C-terminal Catalytic Domain of Rat L-gulono Lactone Oxidase Produced in Bacterial Cells Is Enzymatically Active
Source: Preprints.org preprint supplement (doi:10.20944/preprints202406.1617.v1), 2024-06-24
Supplement: Supplementary file 1 [file supplementary]

**
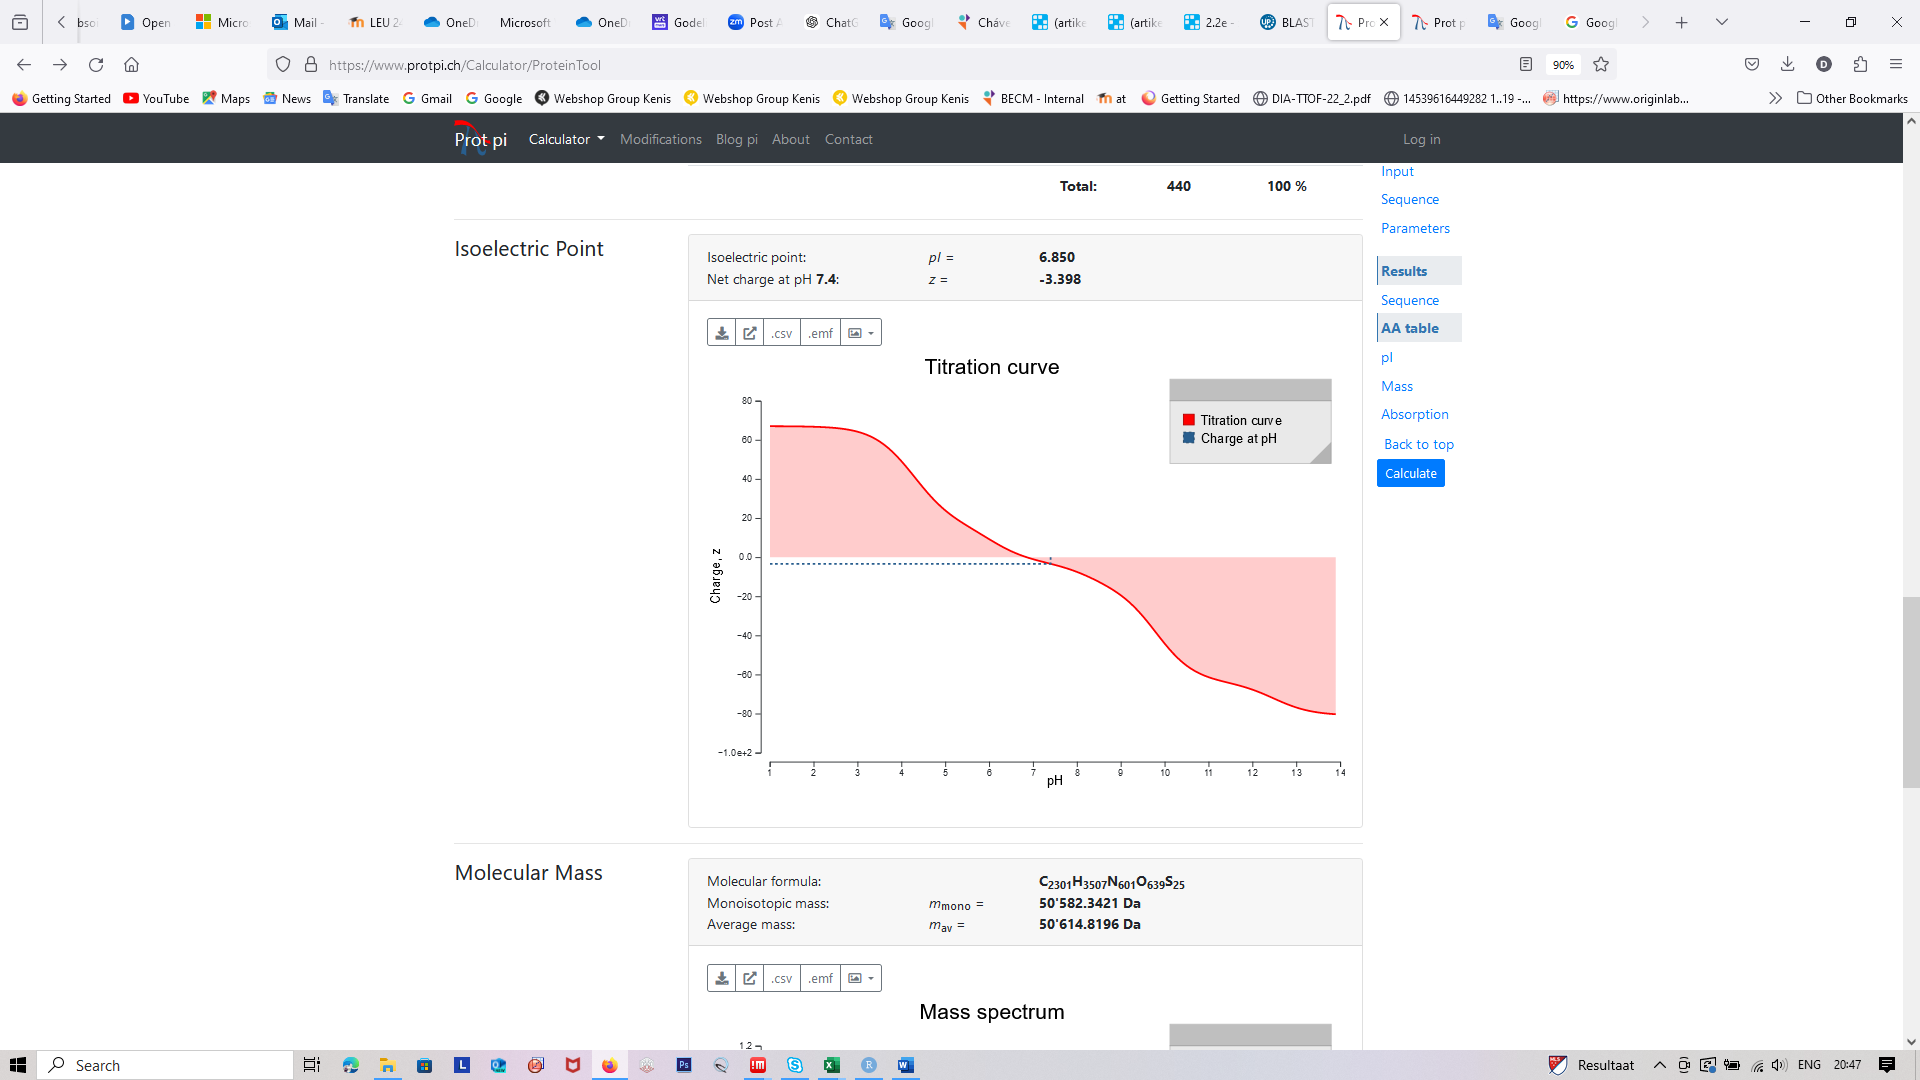
Full-length GULO**

**
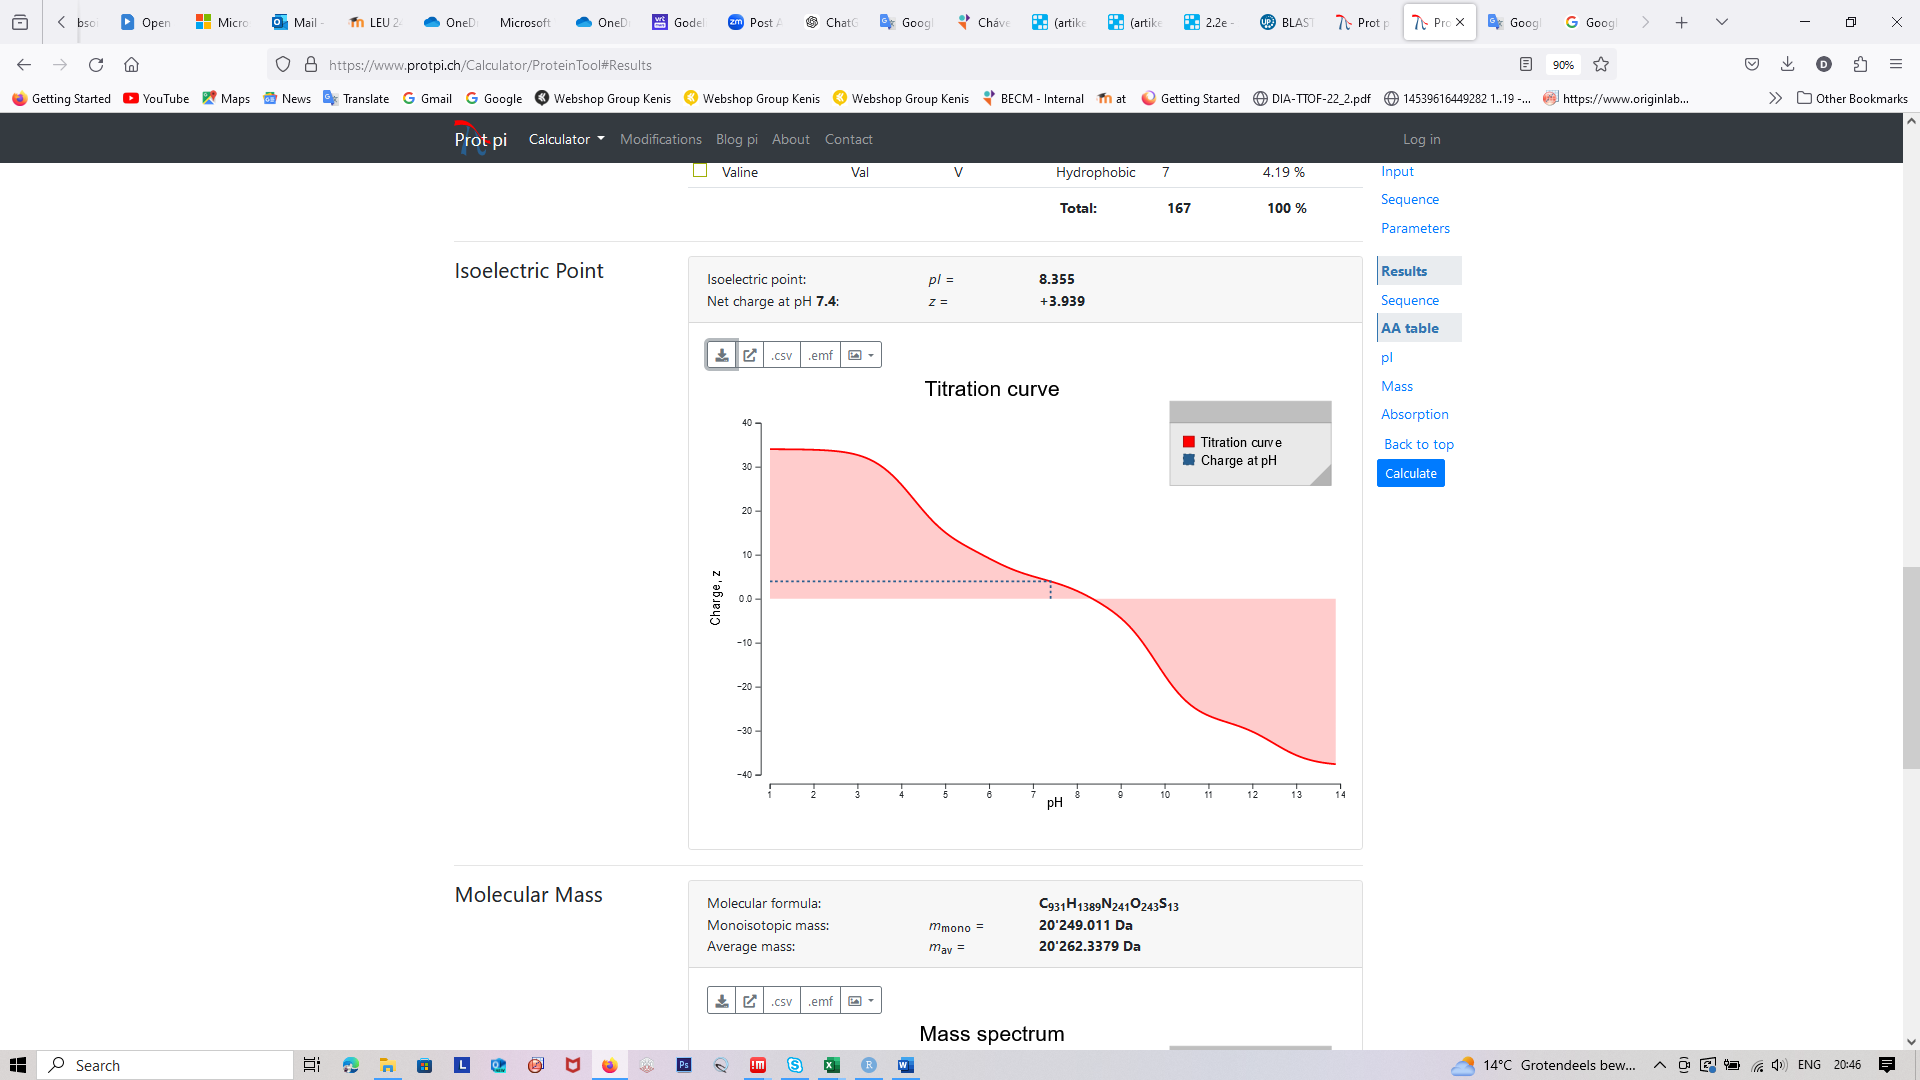
C-terminal part of GULO**

**Supplementary Figure 1**. Comparison of selected physico-chemical properties of full length GULO and C-terminal part of GULO.
